# Supplementary material
Source: PubMed Central journal article supplement (PMC2748947)
Supplement: NIHMS75042-supplement-18.pdf [file NIHMS75042-supplement-18.pdf]

| Table A.I. $\Delta G_{b \rightarrow l}$ for $^{15}\text{N}$ -labeled versus unlabeled ammonium salts |        |                                      |        |
|------------------------------------------------------------------------------------------------------|--------|--------------------------------------|--------|
| $\Delta G_{b \rightarrow l}$ @ 25 °C                                                                 |        | $\Delta G_{b \rightarrow l}$ @ 25 °C |        |
| $(\text{NH}_4)_2\text{SO}_4$                                                                         | -3.41  | $(^{15}\text{NH}_4)_2\text{SO}_4$    | 76.83  |
| $\text{NH}_4\text{Cl}$                                                                               | 243.68 | $^{15}\text{NH}_4\text{Cl}$          | 299.03 |
| $\text{NH}_4\text{NO}_3$                                                                             | 312.43 | $^{15}\text{NH}_4\text{NO}_3$        | 389.14 |
