# Supplementary material
Source: PubMed Central journal article supplement (PMC2748947)

Appendix Figures:

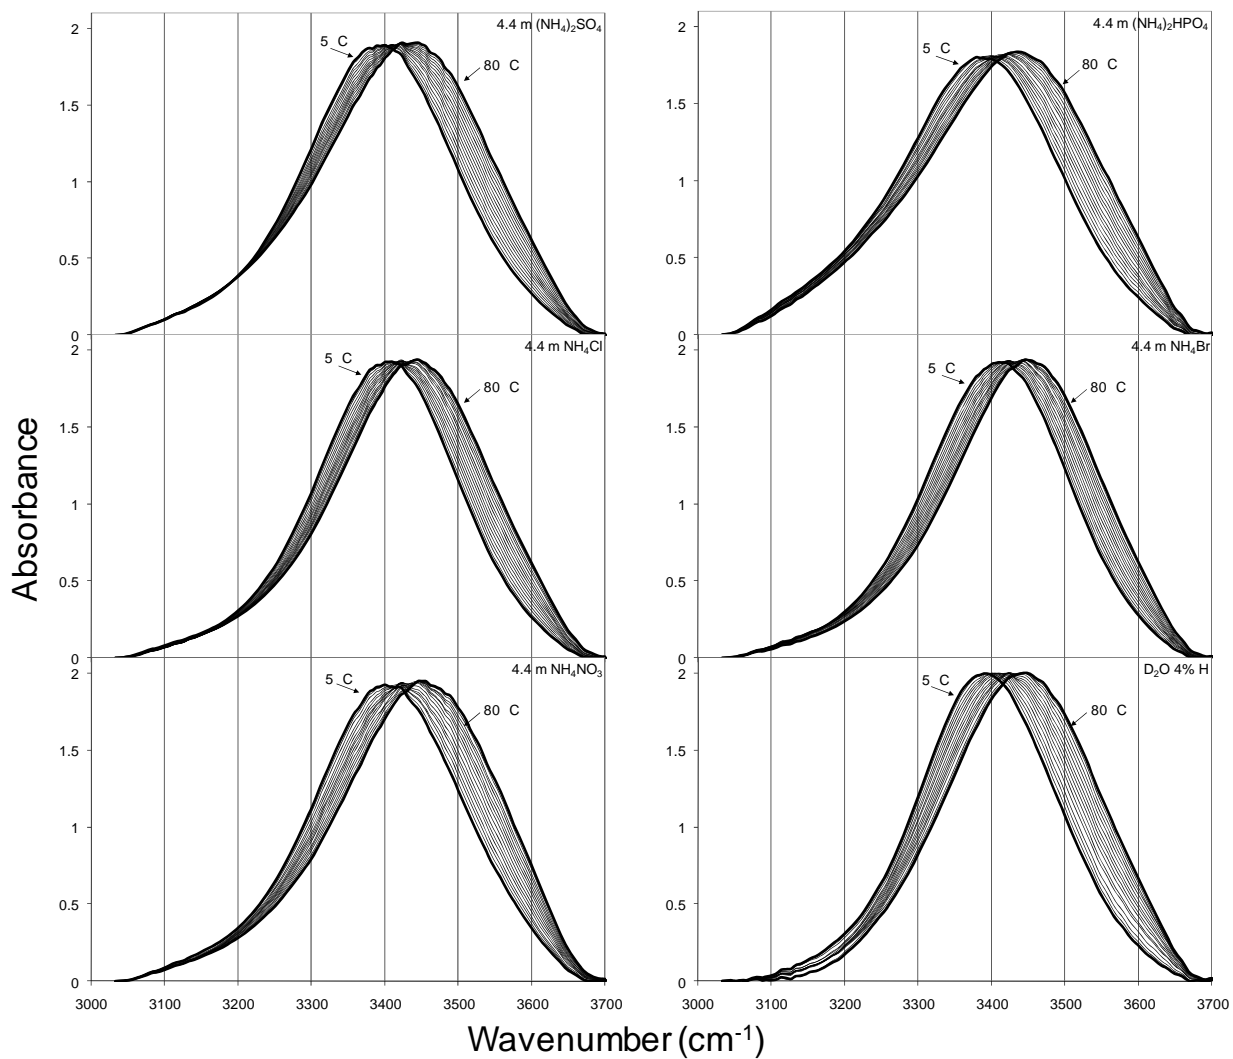

Figure A.1

Supplement: NIHMS75042-supplement-01.pdf [file NIHMS75042-supplement-01.pdf]

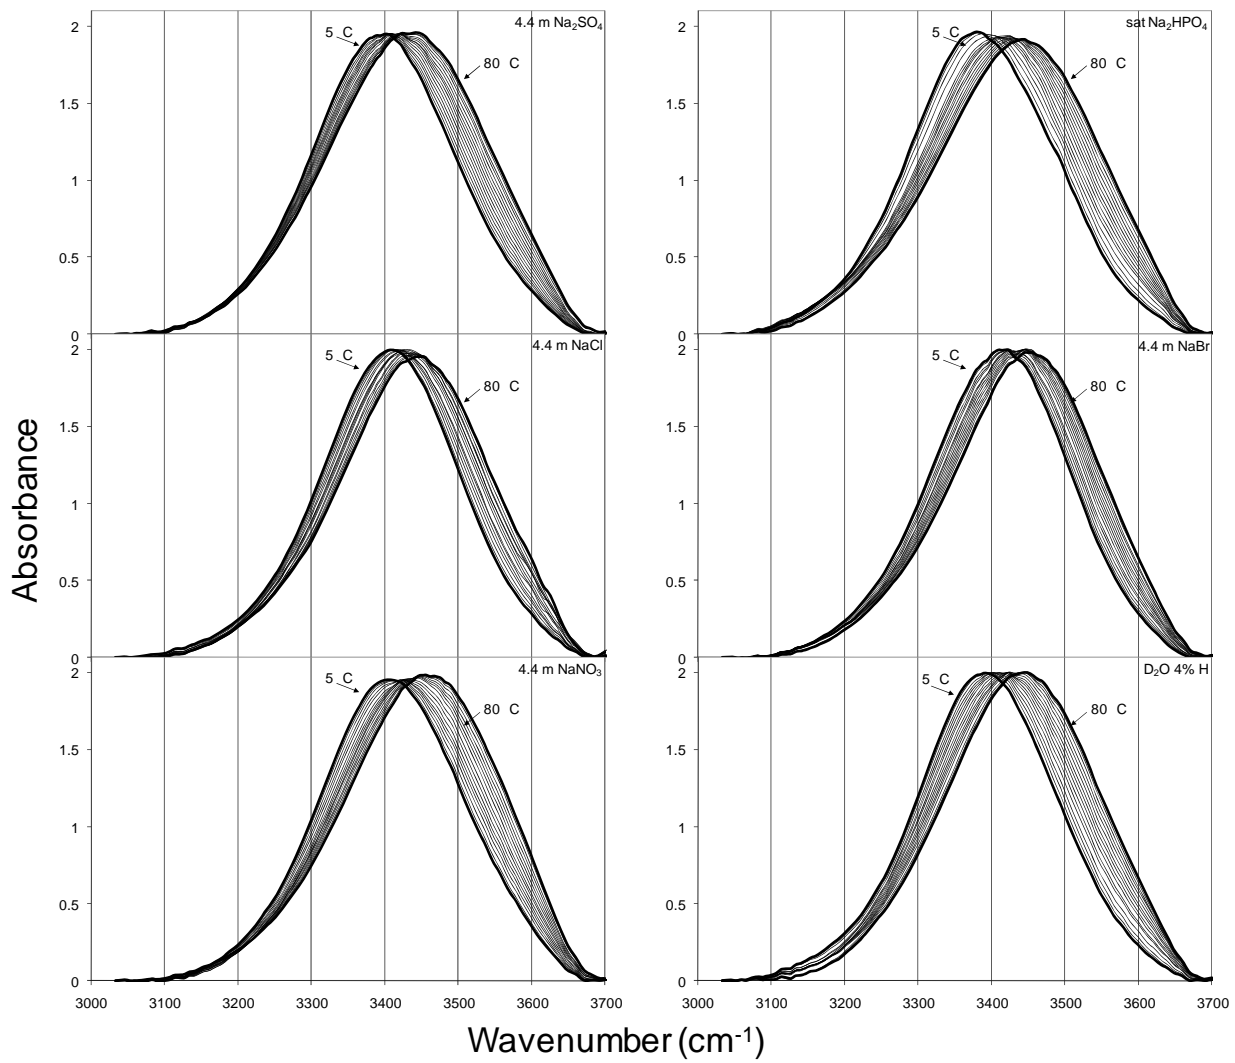

Figure A.2

Supplement: NIHMS75042-supplement-02.pdf [file NIHMS75042-supplement-02.pdf]

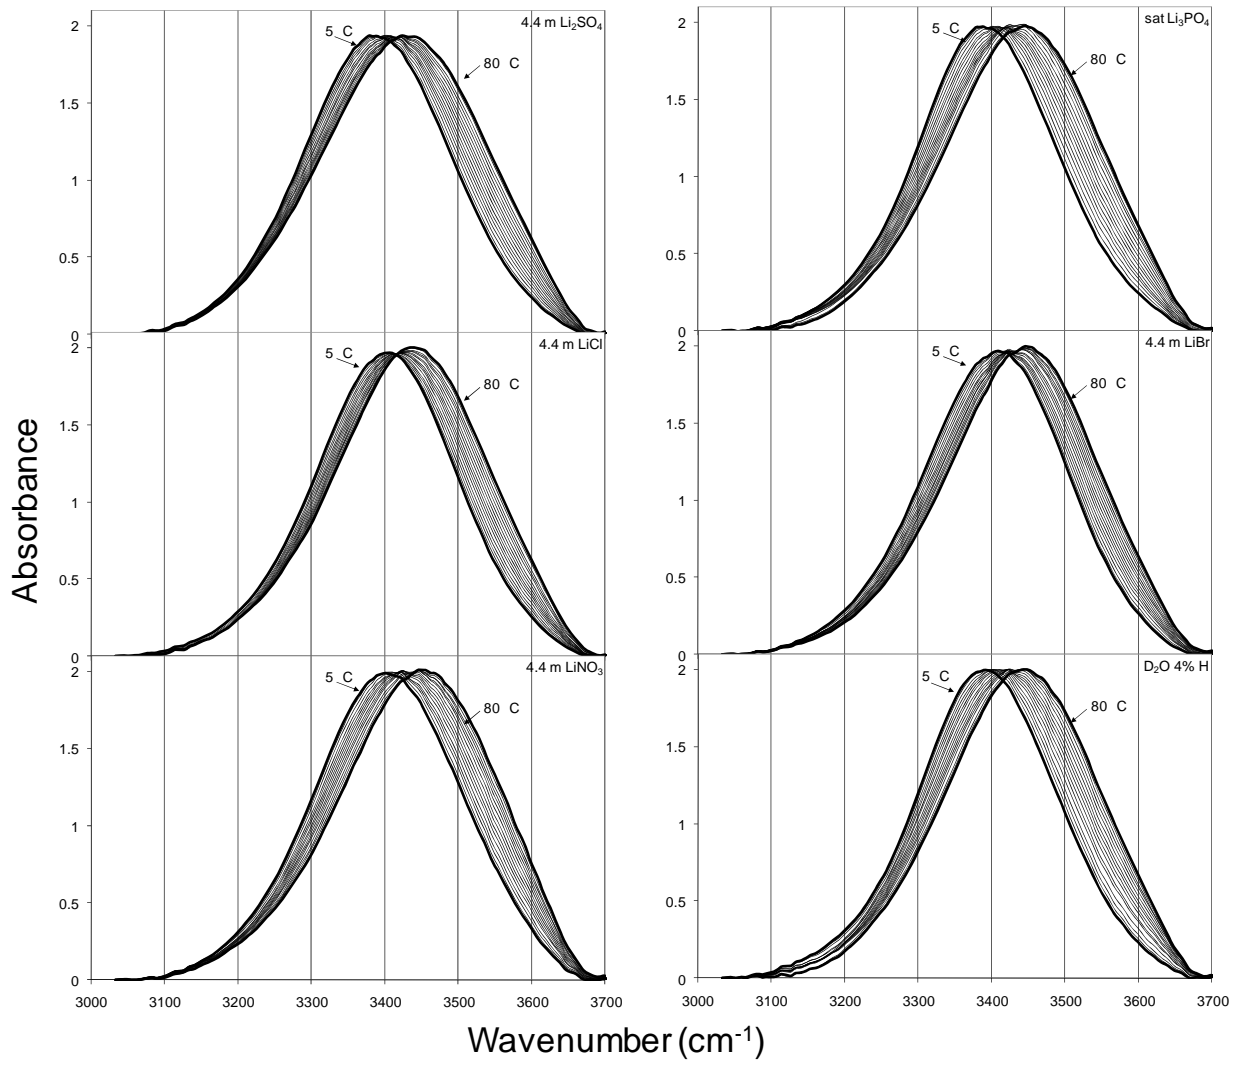

Figure A.3

Supplement: NIHMS75042-supplement-03.pdf [file NIHMS75042-supplement-03.pdf]

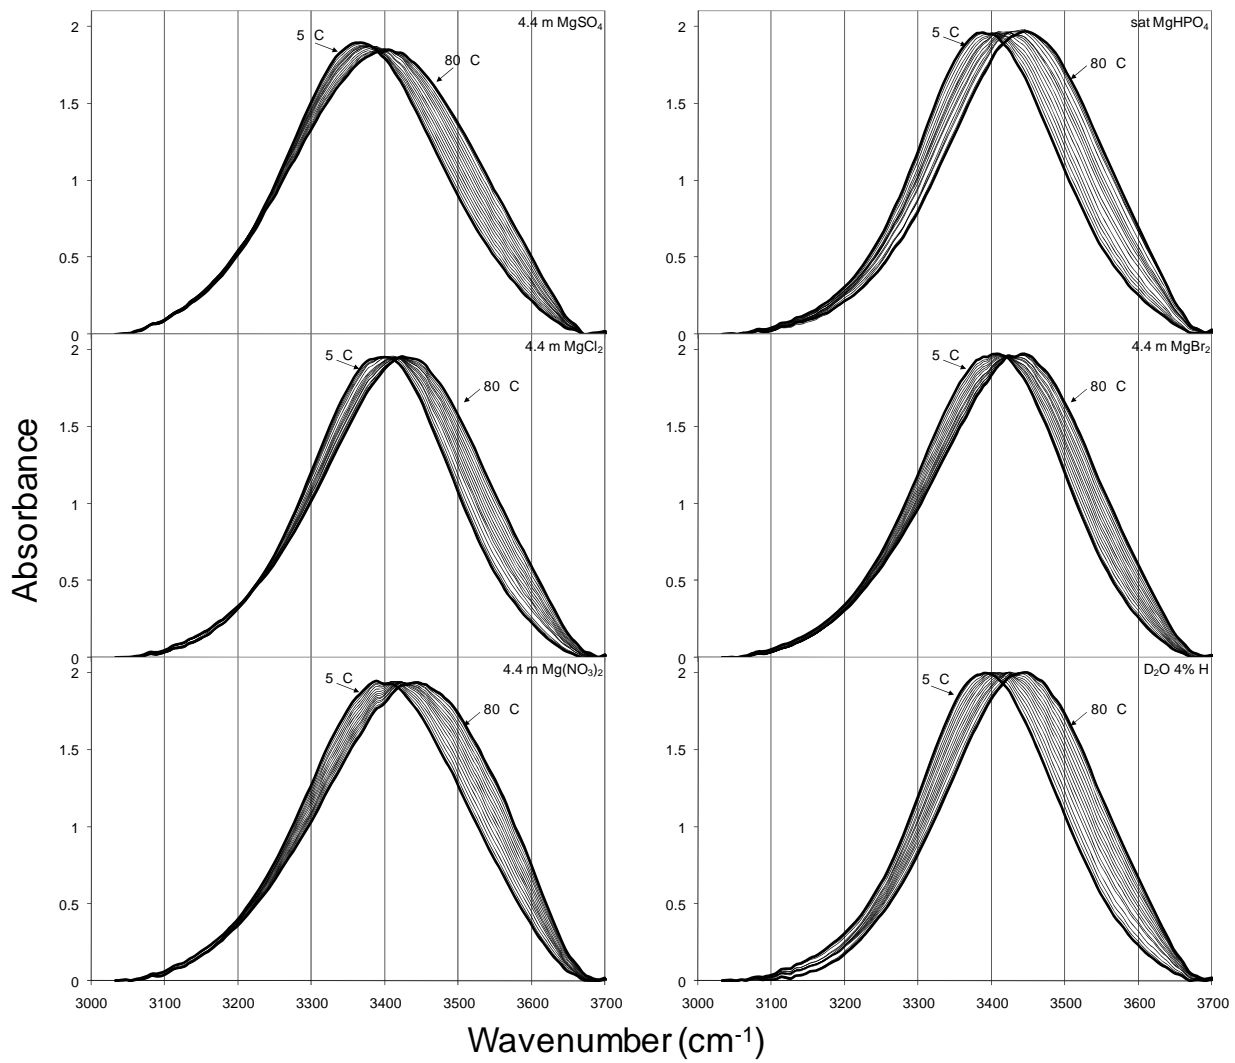

Figure A.4

Supplement: NIHMS75042-supplement-04.pdf [file NIHMS75042-supplement-04.pdf]

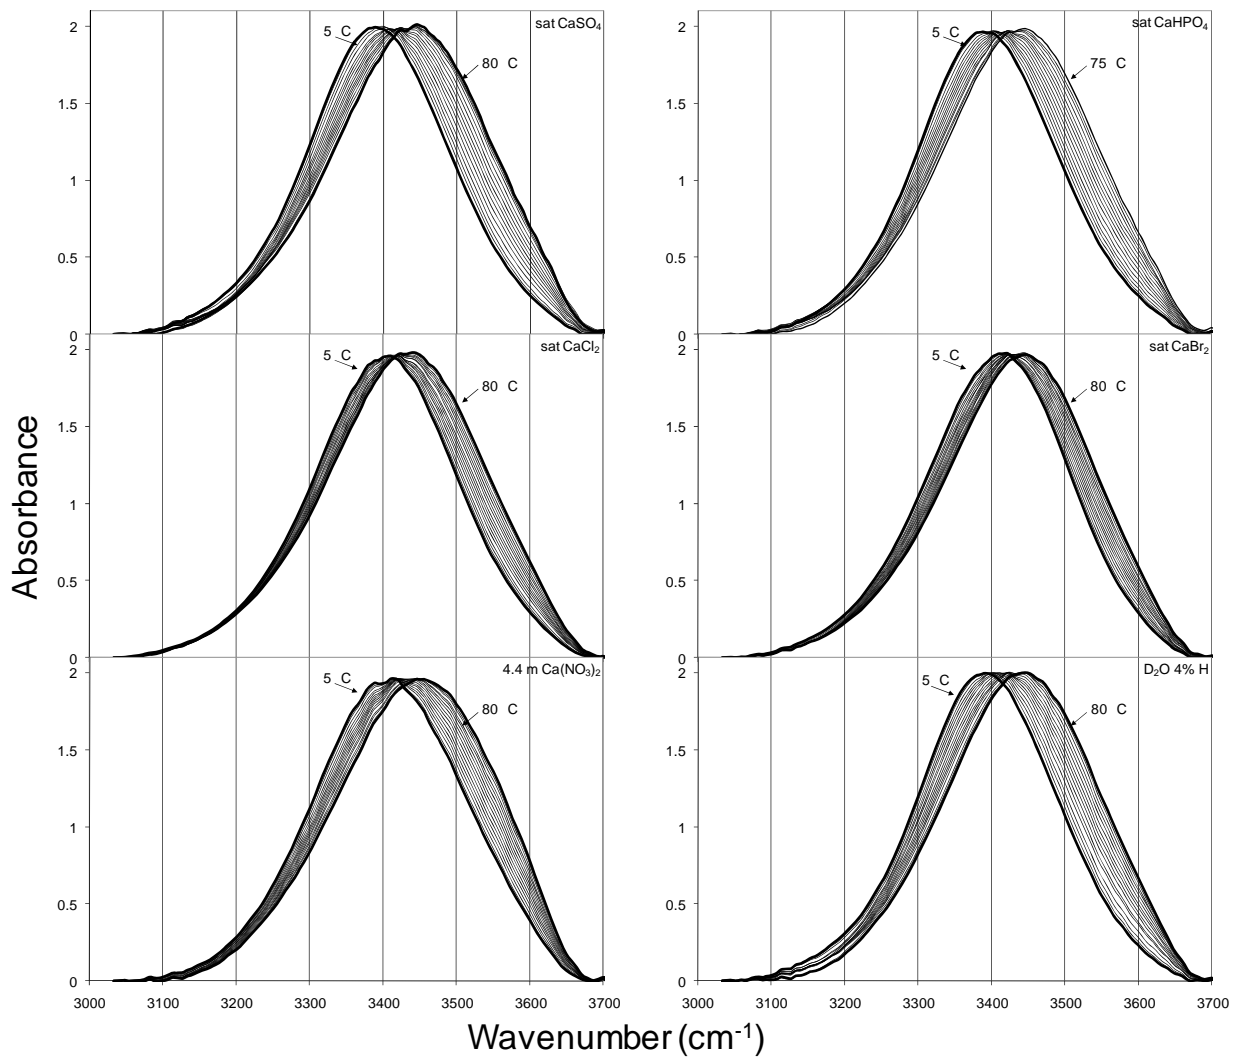

Figure A.5

Supplement: NIHMS75042-supplement-05.pdf [file NIHMS75042-supplement-05.pdf]

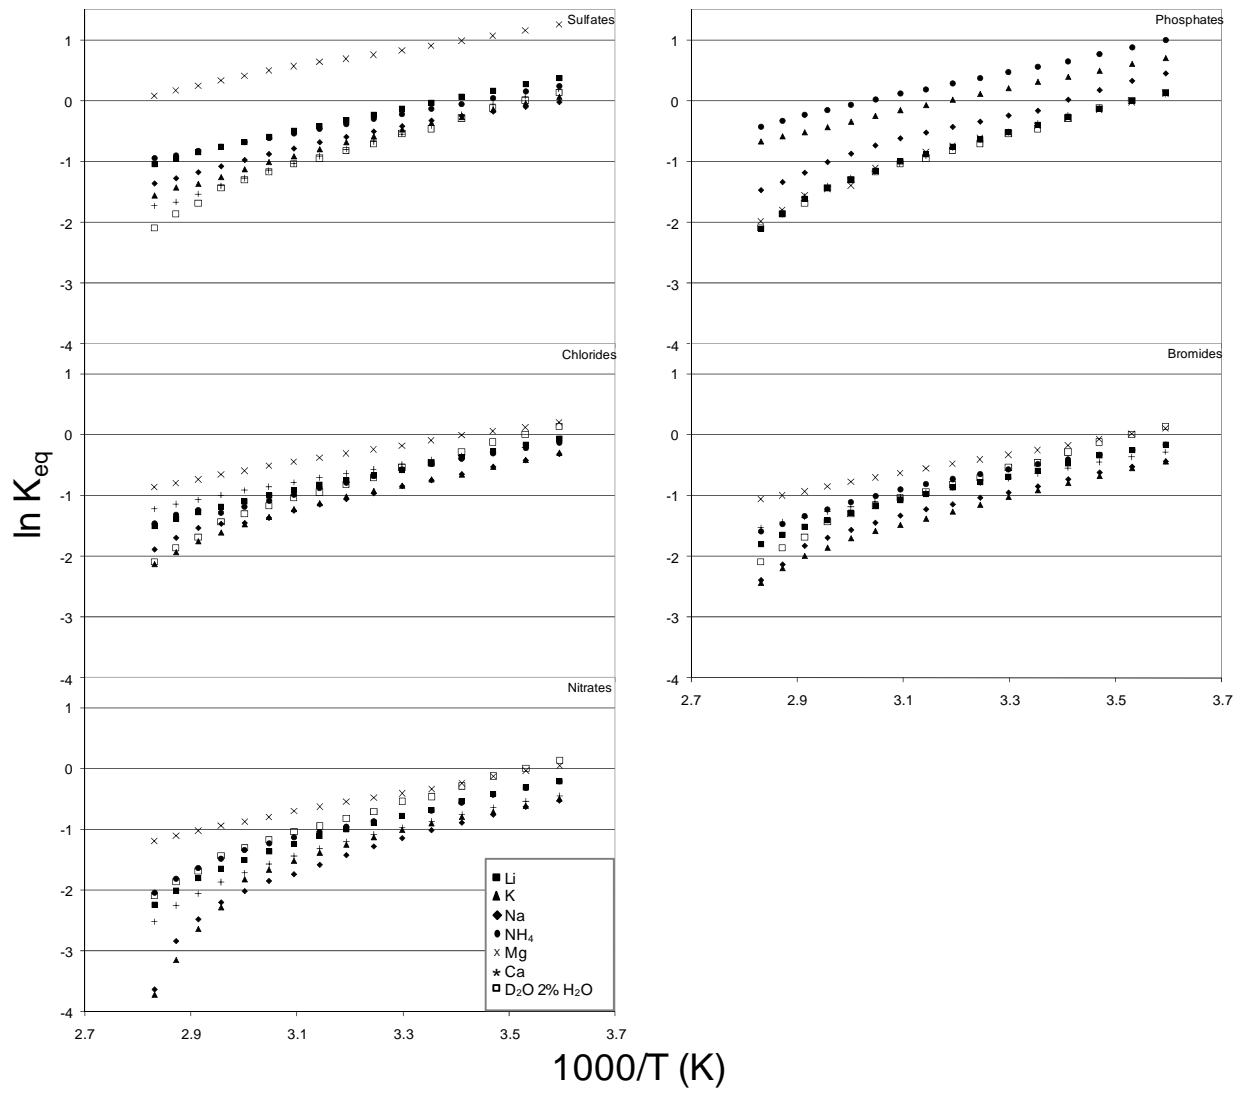

Figure A.6

Supplement: NIHMS75042-supplement-06.pdf [file NIHMS75042-supplement-06.pdf]

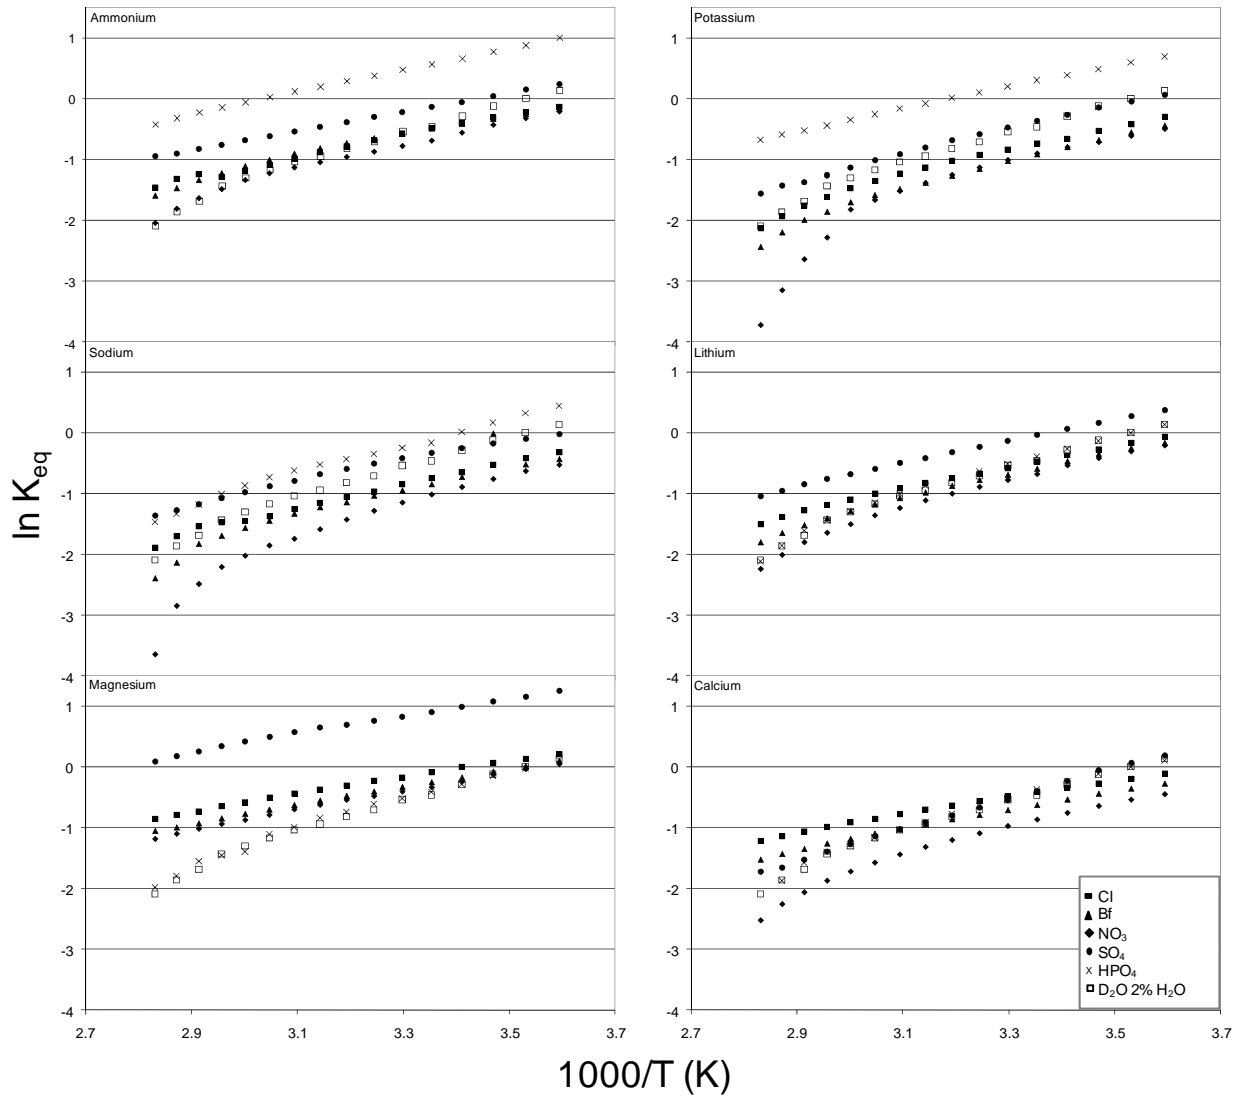

Figure A.7

Supplement: NIHMS75042-supplement-07.pdf [file NIHMS75042-supplement-07.pdf]

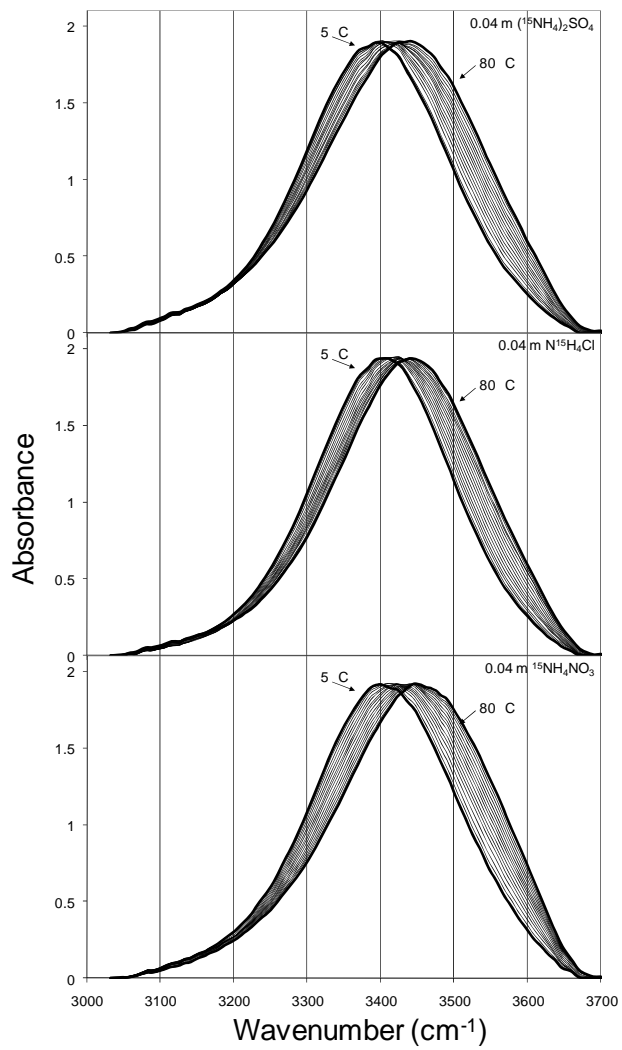

Figure A.8

Supplement: NIHMS75042-supplement-08.pdf [file NIHMS75042-supplement-08.pdf]

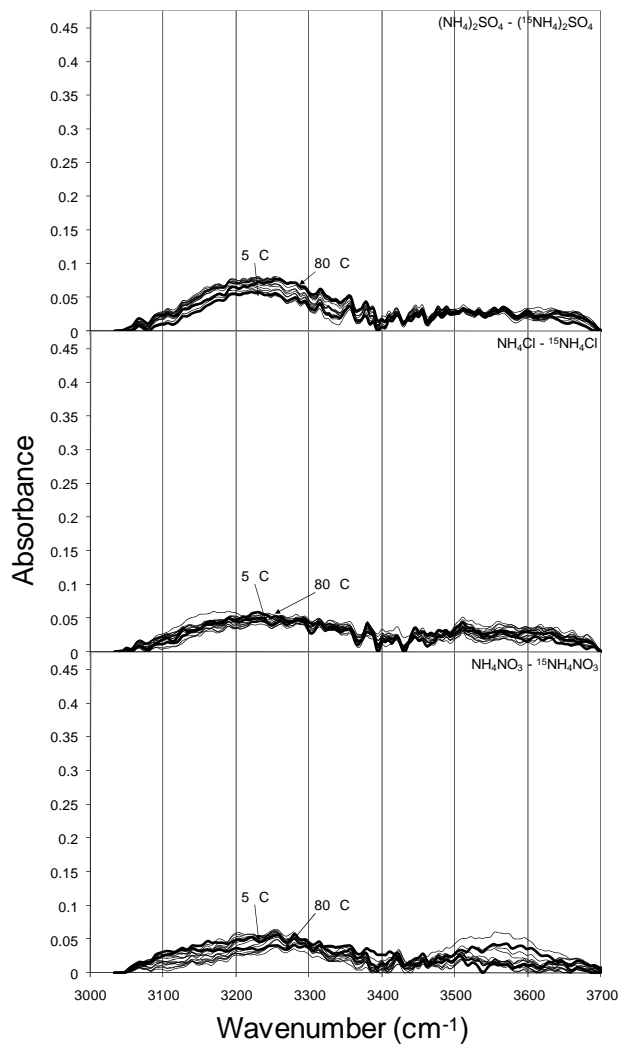

Figure A.9

Supplement: NIHMS75042-supplement-09.pdf [file NIHMS75042-supplement-09.pdf]

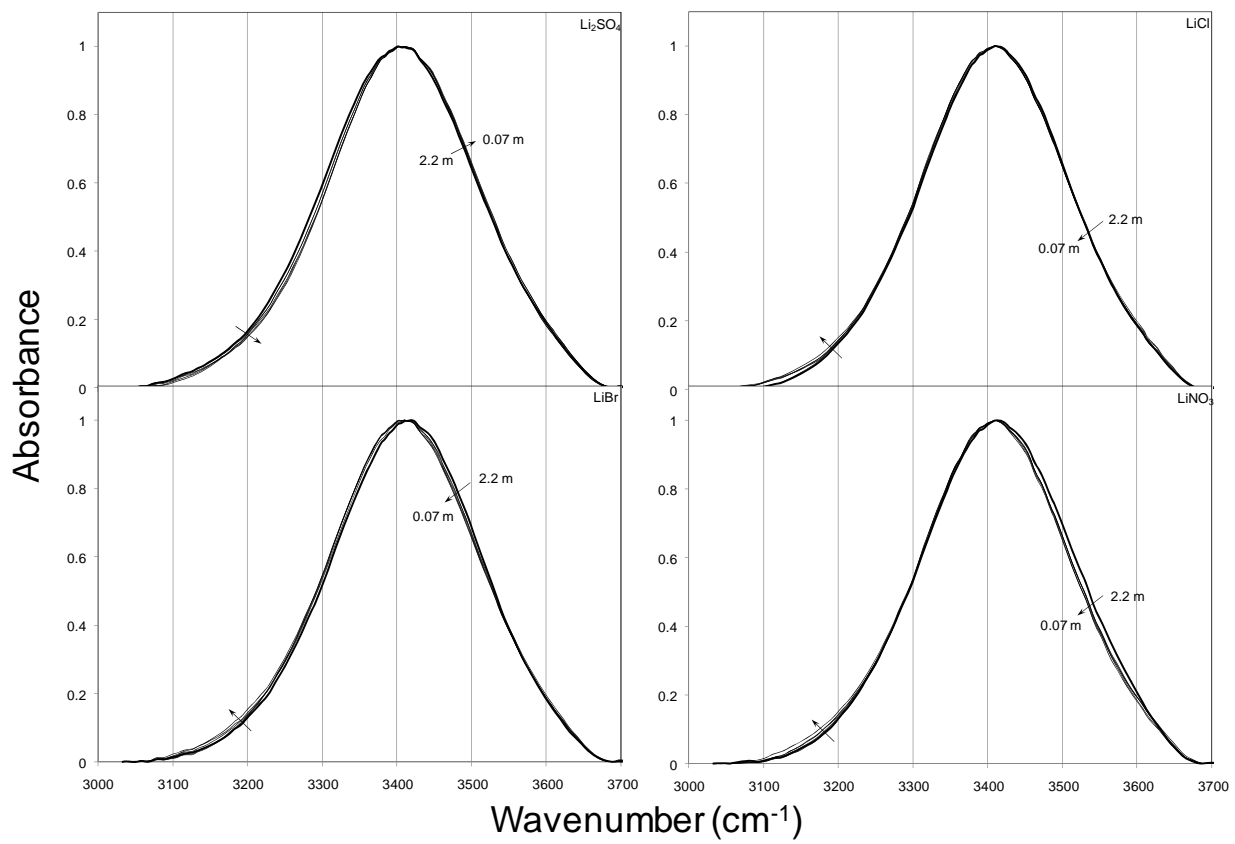

Figure A.10

Supplement: NIHMS75042-supplement-10.pdf [file NIHMS75042-supplement-10.pdf]

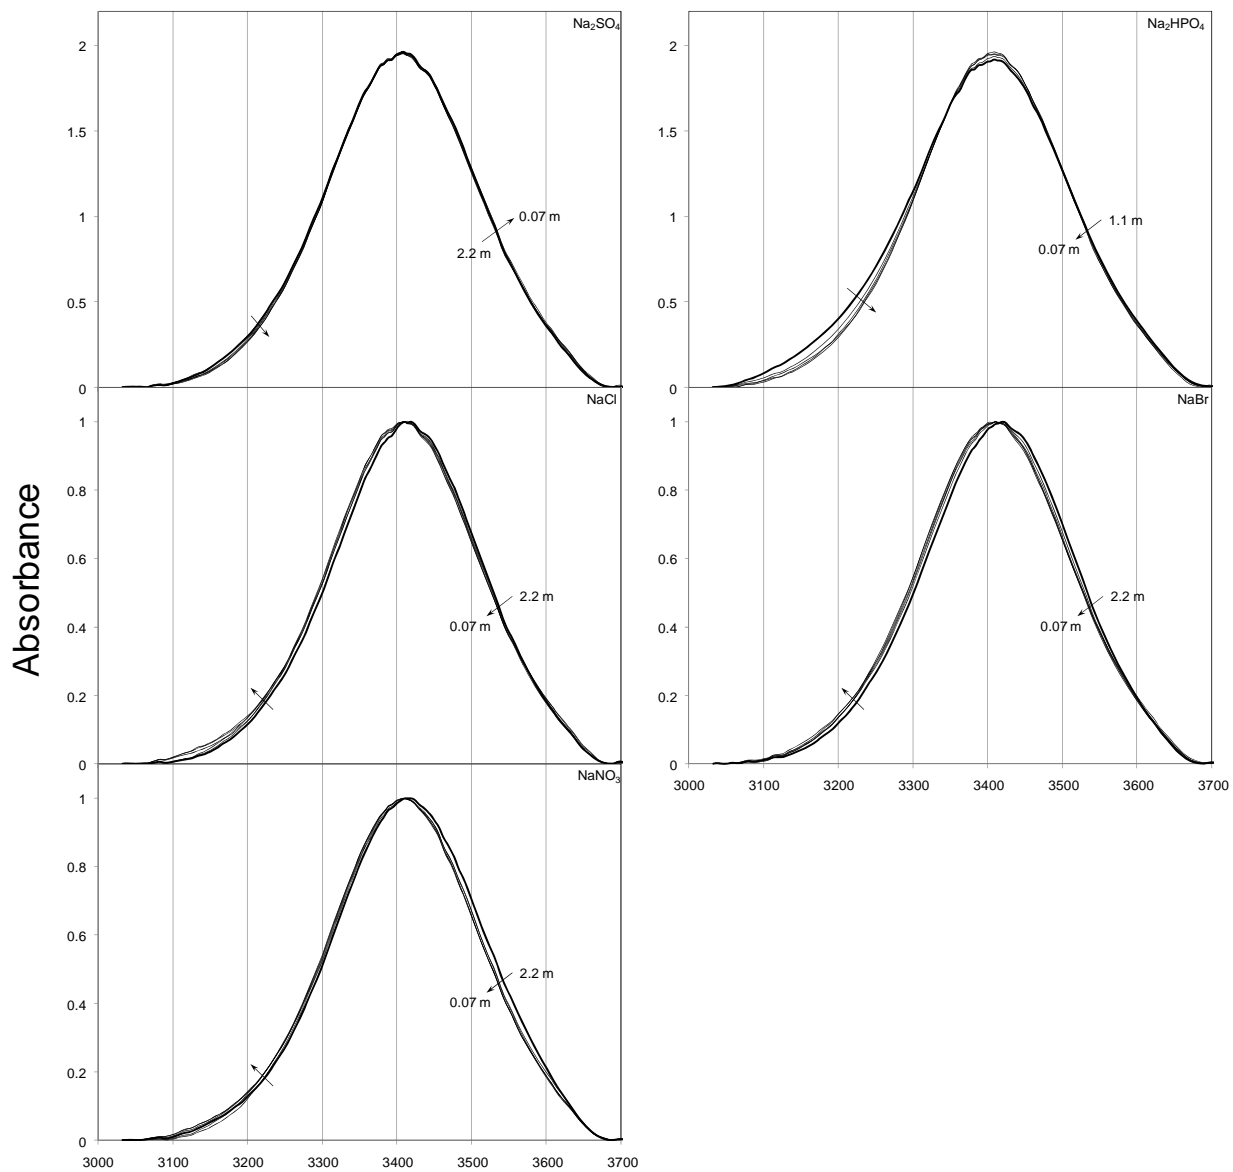

Figure A.11

Supplement: NIHMS75042-supplement-11.pdf [file NIHMS75042-supplement-11.pdf]

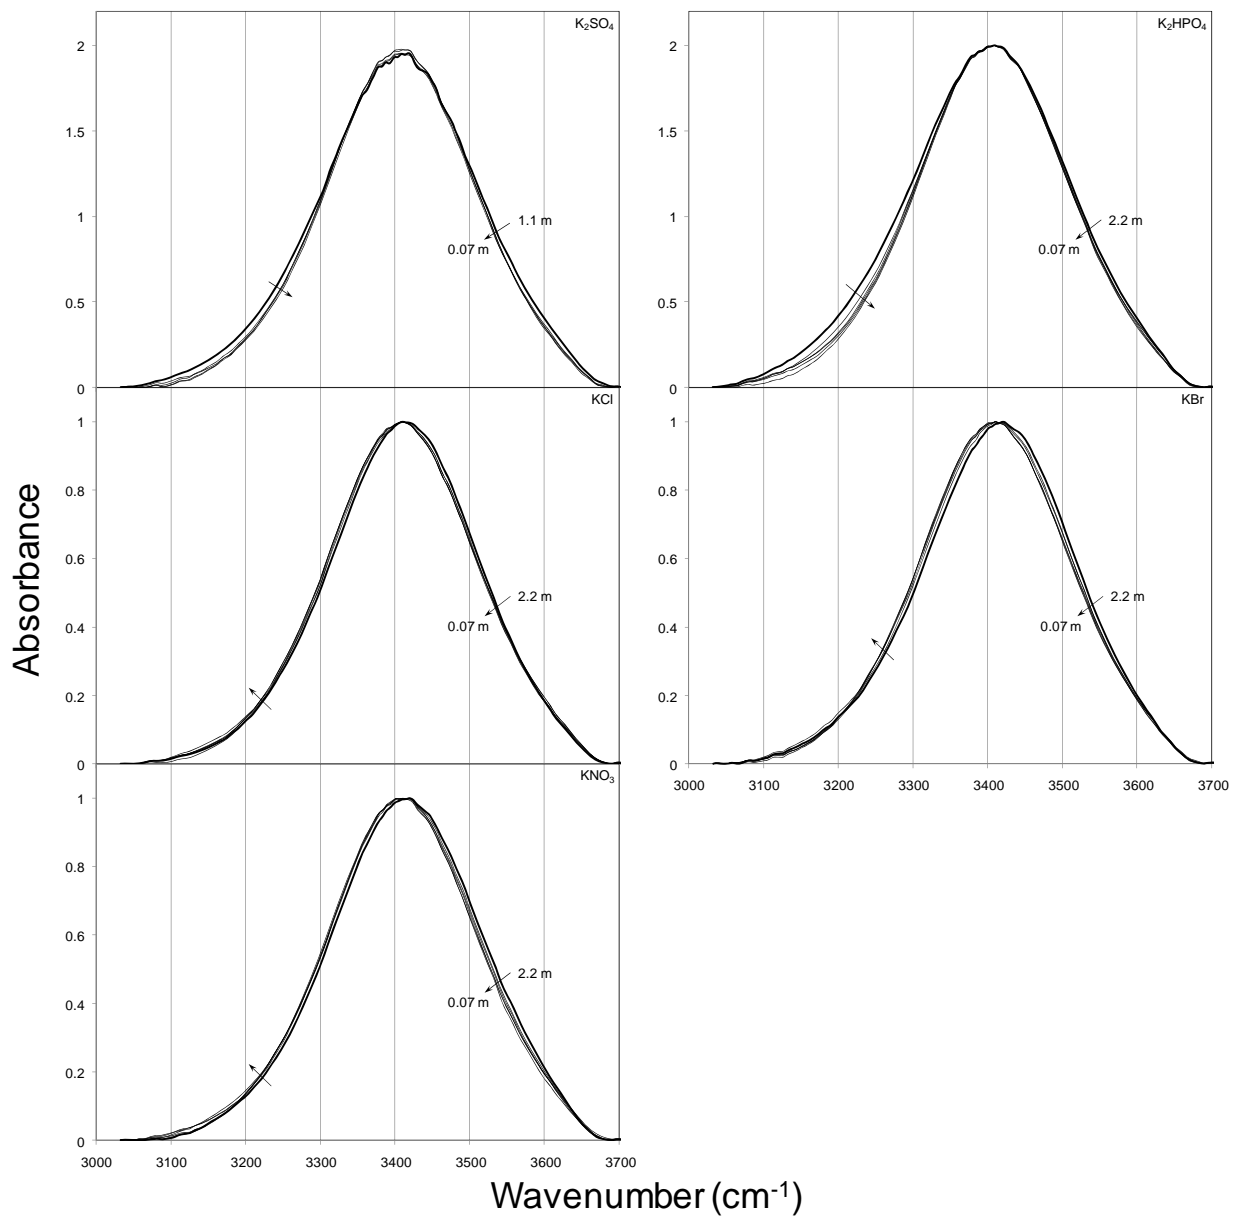

Figure A.12

Supplement: NIHMS75042-supplement-12.pdf [file NIHMS75042-supplement-12.pdf]

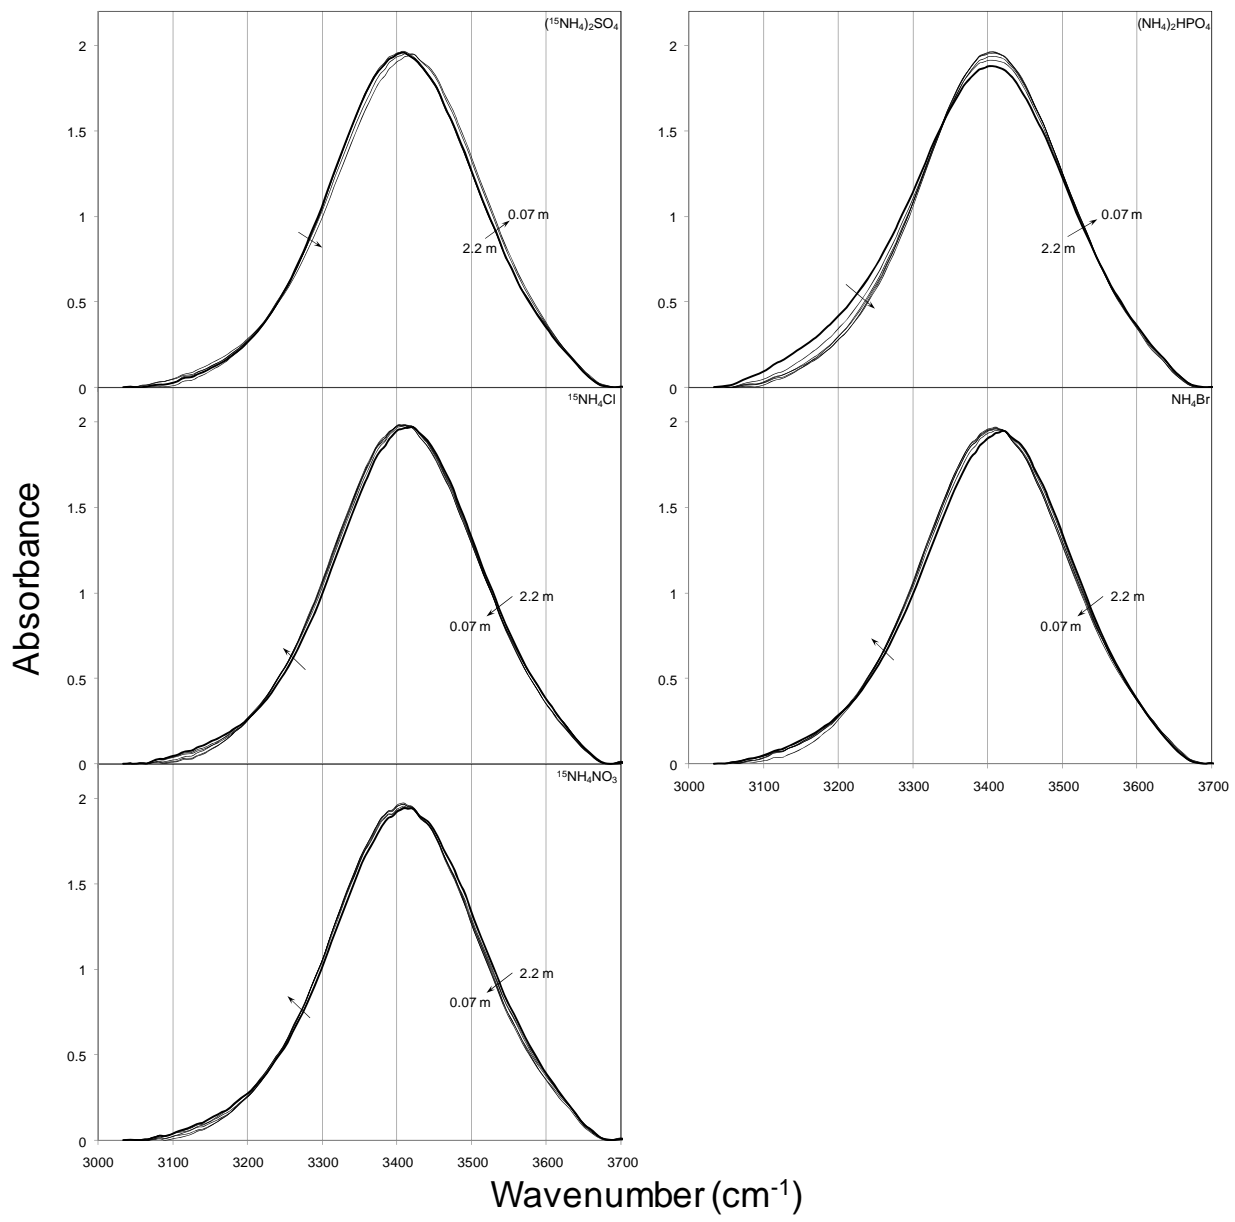

Figure A.13

Supplement: NIHMS75042-supplement-13.pdf [file NIHMS75042-supplement-13.pdf]

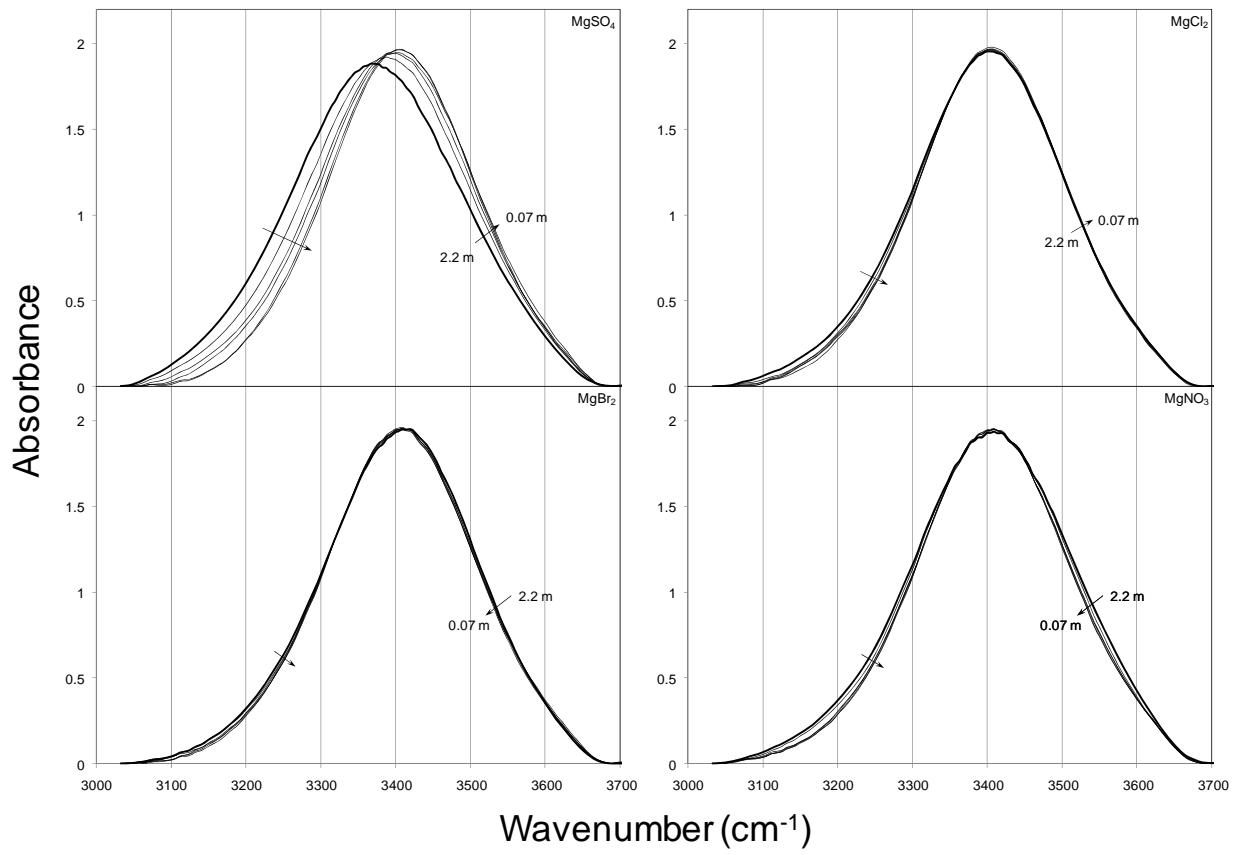

Figure A.14

Supplement: NIHMS75042-supplement-14.pdf [file NIHMS75042-supplement-14.pdf]

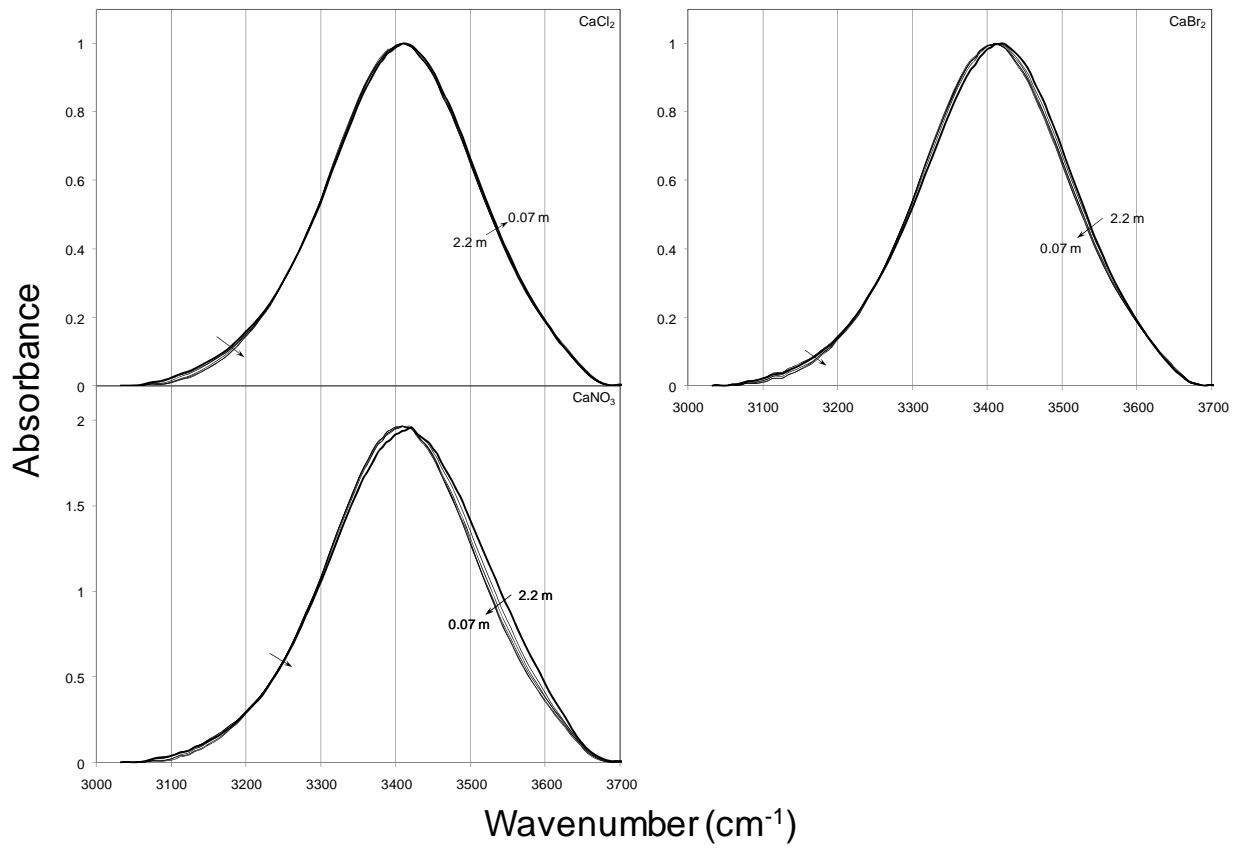

Figure A.15

Supplement: NIHMS75042-supplement-15.pdf [file NIHMS75042-supplement-15.pdf]

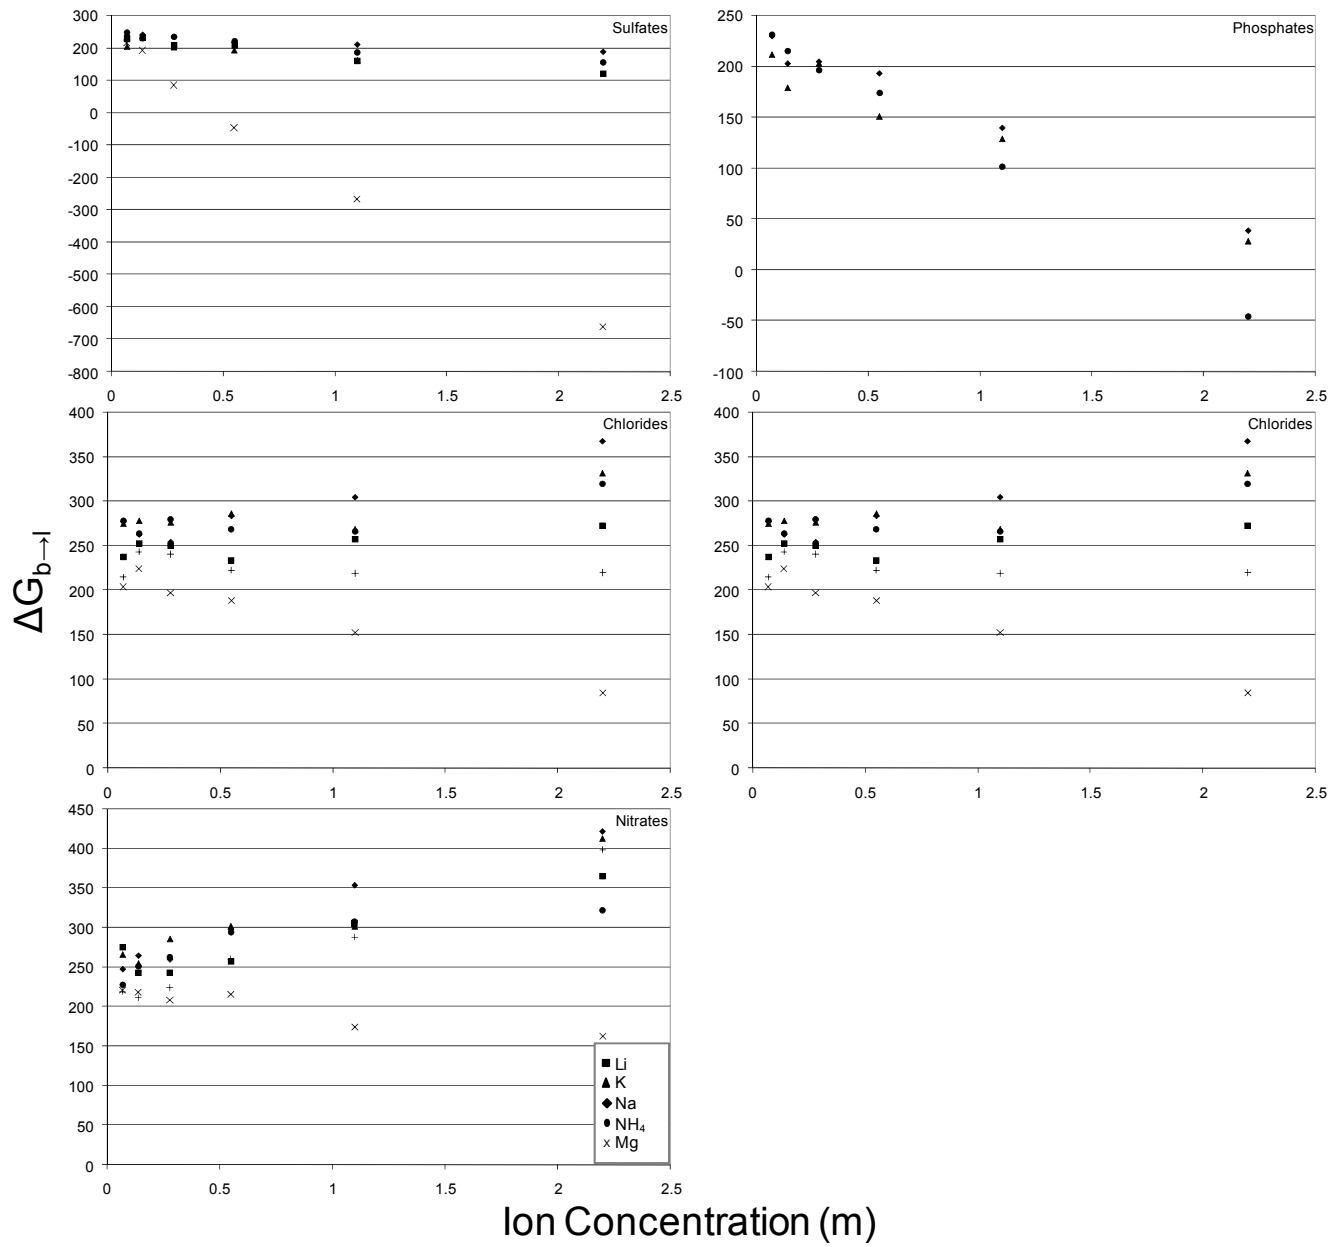

Figure A.16

Supplement: NIHMS75042-supplement-16.pdf [file NIHMS75042-supplement-16.pdf]
